# Supplementary material for: Pulse Electrolysis Technique for Preparation of Bimetal Tin-Containing Electrocatalytic Materials
Source: MDPI journal article supplement (doi:10.3390/catal12111444), 2022-11-15
Supplement: s1 [file s1]

# Supplementary Materials

## Pulse Electrolysis Technique for Preparation of Bimetal Tin-Containing Electrocatalytic Materials

Alexandra Kuriganova <sup>1,\*</sup>, Marina Kubanova <sup>1</sup>, Igor Leontyev <sup>2</sup>, Tatiana Molodtsova <sup>1</sup> and Nina Smirnova <sup>1</sup>

<sup>1</sup> Platov South Russian State Polytechnic University (NPI), 132 Prosvecheniya Str., 346428 Novocherkassk, Russia  
<sup>2</sup> Southern Federal University, Str. Zorge 9, 344090 Rostov-on-Don, Russia  
\* Correspondence: kuriganova\_@mail.ru

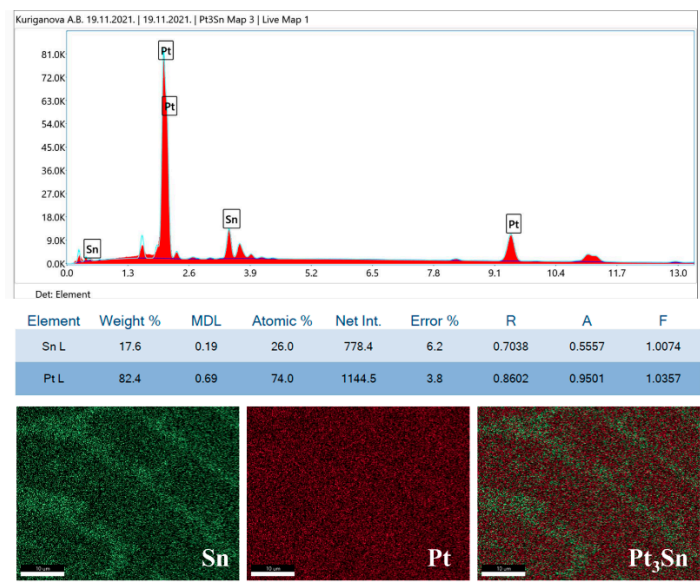

**Figure S1.** Results of the study of the Pt<sub>3</sub>Sn electrode by the method of energy dispersive X-ray spectroscopy.

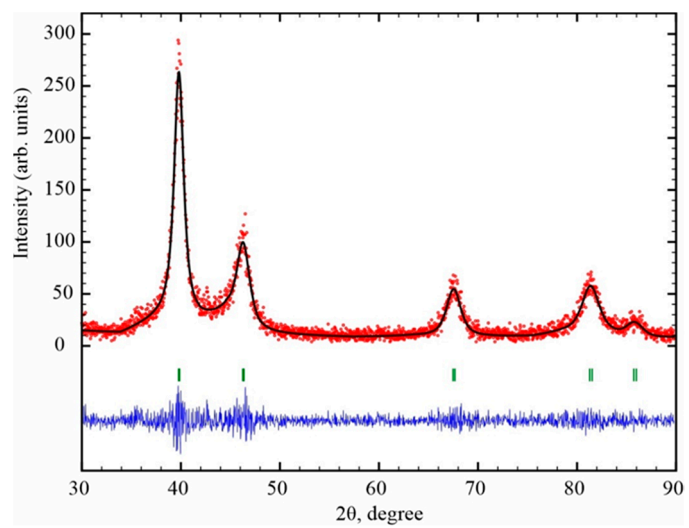

**Figure S2.** XRD powder pattern and Rietveld refinement plot of synthesized carbon supported  $\text{Pt}_3\text{Sn}$  sample. Red dots-observed intensity; black solid line-intensity estimated by the Rietveld refinement; blue line-difference between the experimental and calculated intensities; green tick marks correspond to  $\text{Fm}\bar{3}\text{m}$  unit cell of platinum.

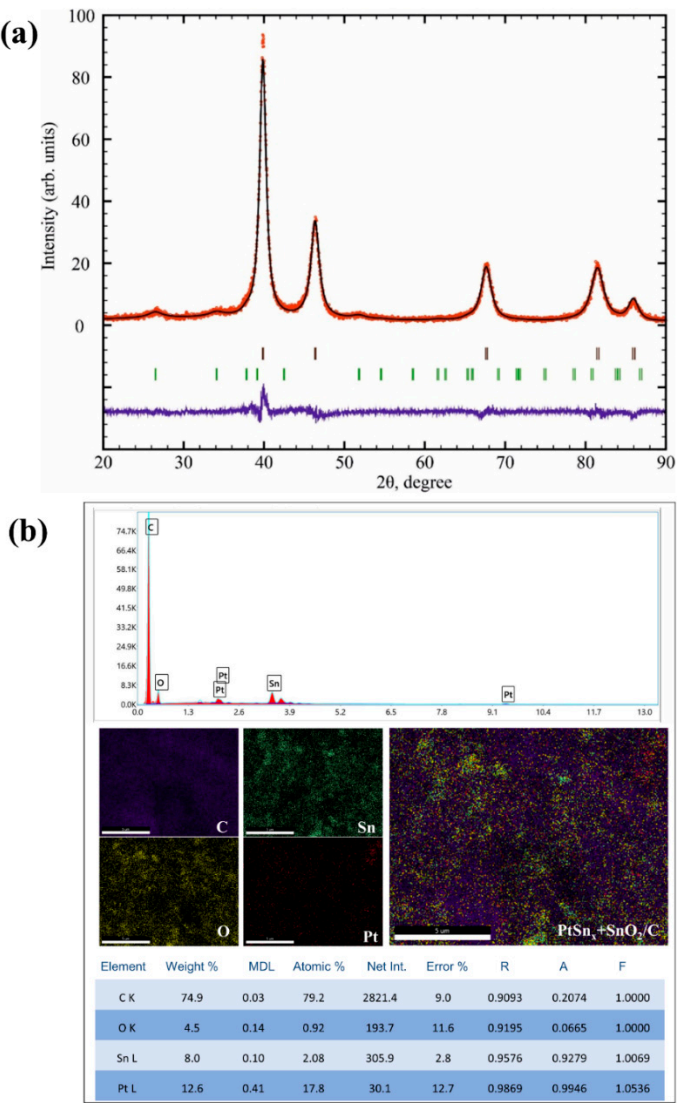

**Figure S3.** XRD powder pattern and Rietveld refinement plot of synthesized carbon supported PtSn<sub>x</sub> sample. Red dots-observed intensity; black solid line-intensity estimated by the Rietveld refinement; blue line-difference between the experimental and calculated intensities; green tick marks correspond to P42/mnm unit cell of SnO<sub>2</sub> phase, brown tick marks correspond to Fm3m unit cell of platinum (a); results of the study of the PtSn<sub>x</sub>+SnO<sub>2</sub>/C material by the method of energy dispersive X-ray spectroscopy (b).

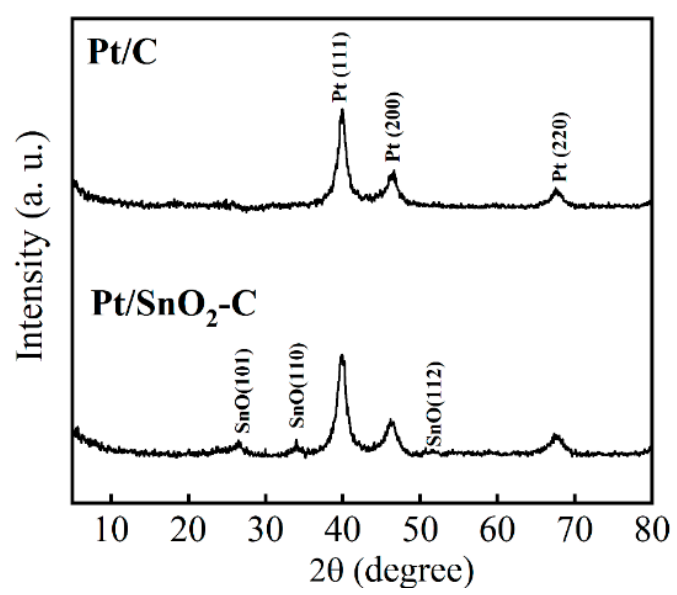

**Figure S4.** XRD powder pattern of Pt/C and Pt/SnO<sub>2</sub>-C.

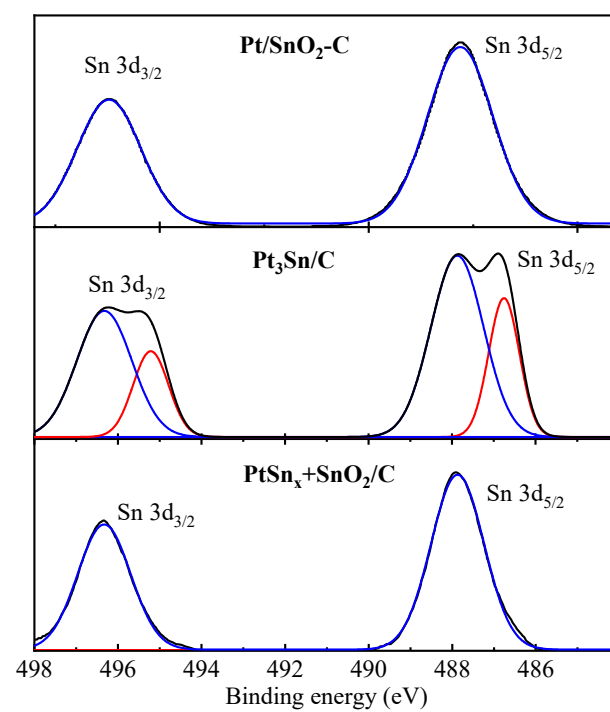

**Figure S5.** Sn 3d spectra of the tin-containing materials prepared via pulse electrolysis, blue line – Sn(IV), red line – Sn(0).

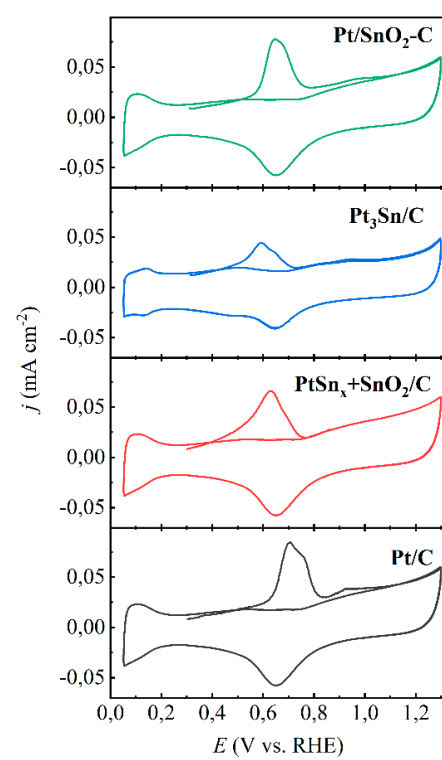

**Figure S6.** CO-stripping of Pt/C and platinum-tin-based materials in 0.5M H<sub>2</sub>SO<sub>4</sub> scan rate 0.02 V s<sup>-1</sup>

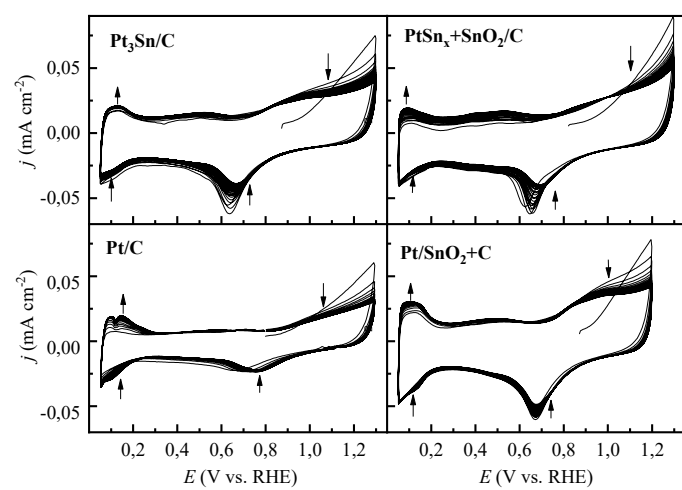

**Figure S7.** CV-curves of Pt/C and platinum-tin-based materials in 0.5M H<sub>2</sub>SO<sub>4</sub> scan rate 0.02 V s<sup>-1</sup>

**Table S1.** Comparison of the electrochemical properties of platinum-tin-based materials.

| Sample                                  | Method                                                                                                                                                                        | Morphology                                                                                               | ECSA, m <sup>2</sup> g <sup>-1</sup> | EOR                          |                                         | Conditions                                                                                                                 | Ref.      |
|-----------------------------------------|-------------------------------------------------------------------------------------------------------------------------------------------------------------------------------|----------------------------------------------------------------------------------------------------------|--------------------------------------|------------------------------|-----------------------------------------|----------------------------------------------------------------------------------------------------------------------------|-----------|
|                                         |                                                                                                                                                                               |                                                                                                          |                                      | E <sub>onset</sub> , V (RHE) | j <sub>peak</sub> , mA cm <sup>-2</sup> |                                                                                                                            |           |
| Pt-Sn 3:1/C                             | reduction of metal precursors with formic acid                                                                                                                                | Pt-Sn alloy particles (3.1 nm) supported onto carbon black Vulcan XC-72R                                 | –                                    | 0.55                         | 0.5                                     | CV, 1 M ethanol in 0.5 M H <sub>2</sub> SO <sub>4</sub> , scan rate 20 mV s <sup>-1</sup>                                  | [1]       |
| Pt-Sn/C                                 | Pt-Sn nanoparticles was achieved by the simultaneous use of oleylamine and oleic acid as solvent and capping agents, and W(CO) <sub>6</sub> as a reducing agent, respectively | Pt-Sn nanocubes (10.6 nm) supported onto carbon black Vulcan XC-72R                                      | 32.0                                 | 0.62                         | 1.23                                    | CV, potential range 0.05 – 0.9 V (RHE), 0.5 M H <sub>2</sub> SO <sub>4</sub> + 1M EtOH, scan rate 20 mV s <sup>-1</sup>    | [2]       |
| Pt-Sn/CNT                               | colloidal method followed by a chemical reduction                                                                                                                             | spherical nanoparticles homogeneously dispersed on the carbon nanotubes surface                          | –                                    | 0.68                         | 0.141                                   | CV, potential range 0.0 – 1.6 V (NHE), 1 M ethanol in 0.5 M H <sub>2</sub> SO <sub>4</sub>                                 | [3]       |
| Pt/SnO <sub>2</sub> /CNTs               | <i>in situ</i> anchoring strategy                                                                                                                                             | Pt (3.1 nm) and SnO <sub>2</sub> nanoparticles homogeneously dispersed on the carbon nanotubes surface.  | 28.79                                | 0.66                         | –                                       | CV, potential range 0.0 – 1.2 V (RHE), 0.5 M H <sub>2</sub> SO <sub>4</sub> + 1M EtOH, scan rate 20 mV s <sup>-1</sup>     | [4]       |
| Pt/SnO <sub>2</sub> (3:1)/CB            | modified Bönemann method                                                                                                                                                      | Pt and SnO <sub>2</sub> particles dispersed on the carbon black;<br>Pt: 3.1 ± 0.5 nm<br>Sn: 2.5 ± 0.3 nm | –                                    | 0.32                         | 0.80                                    | CV, 0.5 M H <sub>2</sub> SO <sub>4</sub> + 1M EtOH, scan rate 20 mV s <sup>-1</sup>                                        | [5]       |
| PtSn <sub>x</sub> + SnO <sub>2</sub> /C | Pulse electrolysis                                                                                                                                                            | Pt nanoparticles (5.6 ± 0.6 nm) doping with Sn dispersed on the SnO <sub>2</sub> and Vulcan XC-72        | 12.3±1.2                             | 0.62                         | 0.84                                    | CV, potential range 0.05 – 1.5 V (RHE), 0.5 M H <sub>2</sub> SO <sub>4</sub> + 0.5 M EtOH, scan rate 20 mV s <sup>-1</sup> | This work |
| Pt/SnO <sub>2</sub> -C                  |                                                                                                                                                                               | Pt nanoparticles (7.3 ± 1.0 nm) dispersed on the SnO <sub>2</sub> + Vulcan XC-72 support                 | 13.1±1.5                             | 0.62                         | 1.19                                    |                                                                                                                            | This work |
| Pt <sub>3</sub> Sn/C                    |                                                                                                                                                                               | Pt <sub>3</sub> Sn alloyed particles (5.7 ± 0.8 nm) dispersed on the Vulcan XC-72 support                | 13.5±1.5                             | 0.61                         | 0.64                                    |                                                                                                                            | This work |

## References

1. Rizo, R.; Sebastián, D.; Lázaro, M.J.; Pastor, E., On the design of Pt-Sn efficient catalyst for carbon monoxide and ethanol oxidation in acid and alkaline media. *Applied Catalysis B: Environmental* **2017**, *200*, 246-254.
2. Rizo, R.; Arán-Ais, R.M.; Padgett, E.; Muller, D.A.; Lázaro, M.J.; Solla-Gullón, J.; Feliu, J.M.; Pastor, E.; Abruña, H.D., Pt-Richcore/Sn-Richsubsurface/Ptskin Nanocubes As Highly Active and Stable Electrocatalysts for the Ethanol Oxidation Reaction. *Journal of the American Chemical Society* **2018**, *140*, 3791-3797.
3. Romero-Cano, L.A.; Rosado-Ortiz, G.; Valenzuela-Muñiz, A.M.; Ordóñez, L.C.; Gauvin, R.; Verde Gómez, Y., Solvent effect in the synthesis of nanostructured Pt–Sn/CNT as electrocatalysts for the electrooxidation of ethanol. *Int. J. Hydrogen Energy* **2019**, *44*, 12430-12438.
4. Li, J.J.; Wang, J.S.; Guo, X.; Zhao, J.H.; Song, C.Y.; Wang, L.C., Improving the Stability and Ethanol Electro-Oxidation Activity of Pt Catalysts by Selectively Anchoring Pt Particles on Carbon-Nanotubes-Supported-SnO<sub>2</sub>. **2012**, *12*, 898-903.
5. Higuchi, E.; Miyata, K.; Takase, T.; Inoue, H., Ethanol oxidation reaction activity of highly dispersed Pt/SnO<sub>2</sub> double nanoparticles on carbon black. *Journal of Power Sources* **2011**, *196*, 1730-1737.
